# Supplementary material for: Overexpression of GPC6 and TMEM132D in Early Stage Ovarian Cancer Correlates with CD8+ T-Lymphocyte Infiltration and Increased Patient Survival
Source: PubMed Central journal article supplement (PMC4584051; doi:10.1155/2015/712438), 2015-09-13
Supplement: 712438.f1.pdf [file 712438.f1.pdf]

Figure S1

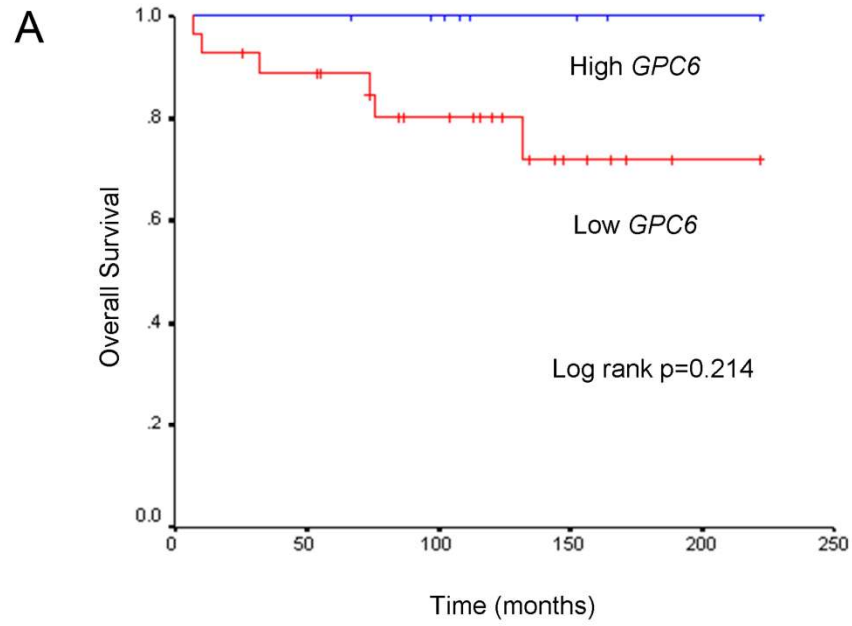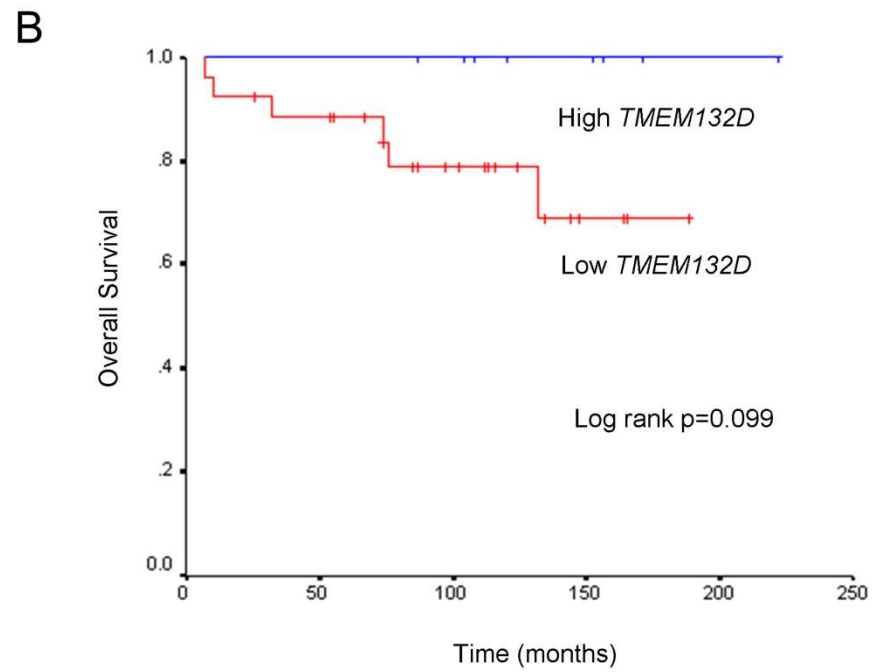

**Table S1: Association of *GPC6* mRNA level with the stage, grade and histotype of the 35 early stage tumors.**

|                               | Stage         |              | Grade        |              |               | Histological subtype |            |            |
|-------------------------------|---------------|--------------|--------------|--------------|---------------|----------------------|------------|------------|
|                               | I             | II           | 0-1          | 2            | 3             | Endometrioid         | Serous     | Clear cell |
| <b><i>GPC6</i> high (N=7)</b> | 6<br>(21.4%)  | 1<br>(14.3%) | 5<br>(35.7%) | 1<br>(12.5%) | 1<br>(7.7%)   | 6 (30%)              | 1 (9.1%)   | 0 (0%)     |
| <b><i>GPC6</i> low (N=28)</b> | 22<br>(78.6%) | 6<br>(85.7%) | 9<br>(64.3%) | 7<br>(87.5%) | 12<br>(92.3%) | 14 (70%)             | 10 (90.0%) | 4 (100%)   |
| Total N=35                    |               |              |              |              |               |                      |            |            |
| p-value (chi-square)          | 0.673         |              | 0.159        |              |               | 0.216                |            |            |

The relationship of high or low mRNA levels of *GPC6* with clinicopathologic characteristics (stage, grade, histotype) were analyzed by Chi-squared test. Statistically significant associations were not observed.

**Table S2: Association of *TMEM132D* mRNA level with the stage, grade and histotype of the 35 early stage tumors.**

|                                   | Stage       |              | Grade         |            |               | Histological subtype |           |            |
|-----------------------------------|-------------|--------------|---------------|------------|---------------|----------------------|-----------|------------|
|                                   | I           | II           | 0-1           | 2          | 3             | Endometrioid         | Serous    | Clear cell |
| <b><i>TMEM132D</i> high (N=9)</b> | 7 (25%)     | 2 (28.6%)    | 3<br>(21.4%)  | 4<br>(50%) | 2<br>(15.4%)  | 6 (30%)              | 2 (18.2%) | 1 (25%)    |
| <b><i>TMEM132D</i> low (N=26)</b> | 21<br>(75%) | 5<br>(71.4%) | 11<br>(78.6%) | 4<br>(50%) | 11<br>(84.6%) | 14 (70%)             | 9 (81.8%) | 3 (75%)    |
| Total N=35                        |             |              |               |            |               |                      |           |            |
| p-value (chi-square)              | 0.847       |              | 0.189         |            |               | 0.771                |           |            |

The relationship of high or low mRNA levels of *TMEM132D* with clinicopathologic characteristics (stage, grade, histotype) were analyzed by Chi-squared test. Statistically significant associations were not observed.
